# Supplementary material for: A structural analysis of the splice-specific functional impact of the pathogenic familial hemiplegic migraine type 1 S218L mutation on Cav2.1 P/Q-type channel gating
Source: PubMed Central journal article supplement (PMC11580629; doi:10.1186/s13041-024-01152-z), 2024-11-20
Supplement: 13041_2024_1152_MOESM1_ESM.pdf [file 13041_2024_1152_MOESM1_ESM.pdf]

**Supplementary figure 1.** The overlap of membrane potential for steady state activation and inactivation (A:  $\Delta$  SSTR; B: + SSTR) showed that there is a voltage interval at which a steady “window” current might occur (arrow). The window current, represented as the shaded areas below the curves in panels C ( $\Delta$  SSTR) and D (+ SSTR), which correspond to the result of Boltzmann fitting, at a magnified scale. The values in Figure 2 panels D-E were used to replot the graphs shown here.
