# Supplementary material for: A structural analysis of the splice-specific functional impact of the pathogenic familial hemiplegic migraine type 1 S218L mutation on Cav2.1 P/Q-type channel gating
Source: PubMed Central journal article supplement (PMC11580629; doi:10.1186/s13041-024-01152-z), 2024-11-20
Supplement: 13041_2024_1152_MOESM2_ESM.pdf [file 13041_2024_1152_MOESM2_ESM.pdf]

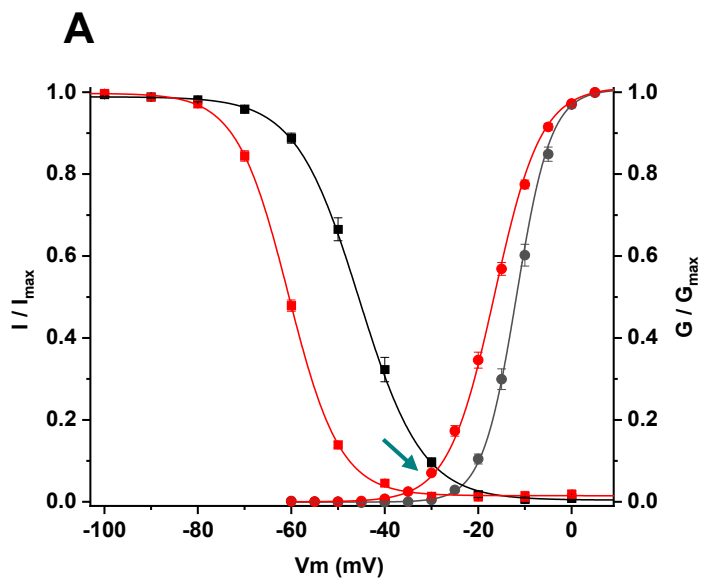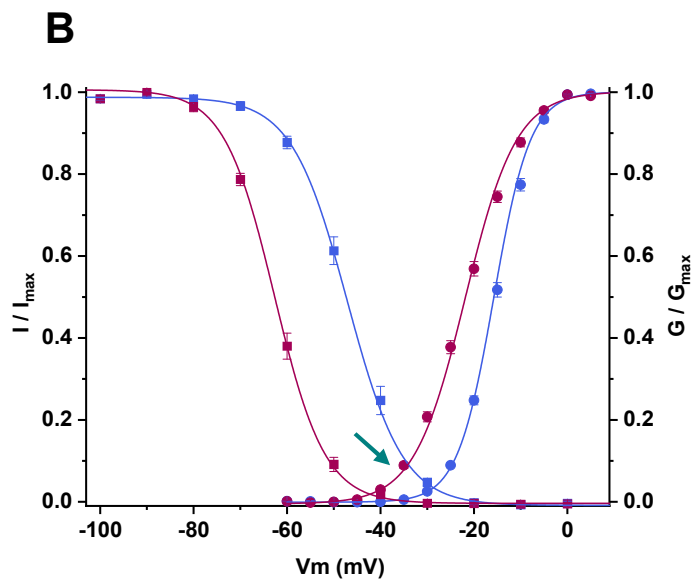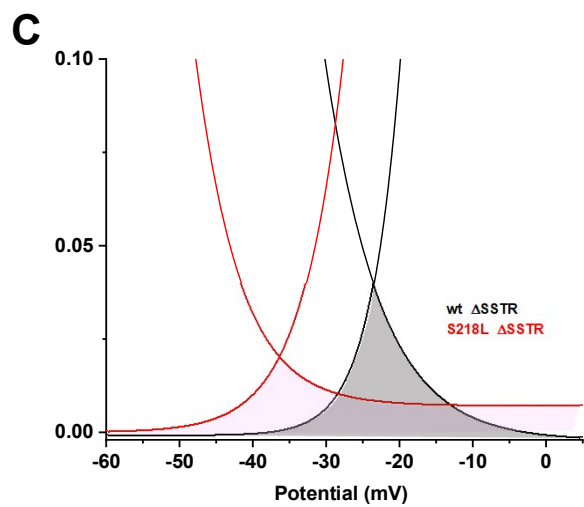

WT -SSTR  $V_{maxW} = -23.51$   
 S218L -SSTR  $V_{maxW} = -36.37$

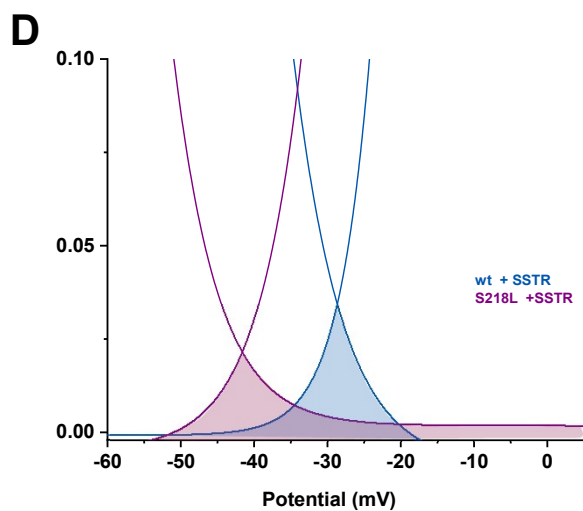

WT +SSTR  $V_{maxW} = -28.61$   
 S218L +SSTR  $V_{maxW} = -41.71$
